# Supplementary material for: Electroacupuncture Attenuates Morphine Tolerance in Rats with Bone Cancer Pain by Inhibiting PI3K/Akt/JNK1/2 Signaling Pathway in the Spinal Dorsal Horn
Source: PubMed Central journal article supplement — Integr Cancer Ther. 2021 Mar 4;20:1534735421995237. doi: 10.1177/1534735421995237 (PMC8164555; doi:10.1177/1534735421995237), 2021-03-04
Supplement: sj-pdf-1-ict-10.1177_1534735421995237.pdf [file sj-pdf-1-ict-10.1177_1534735421995237.pdf]

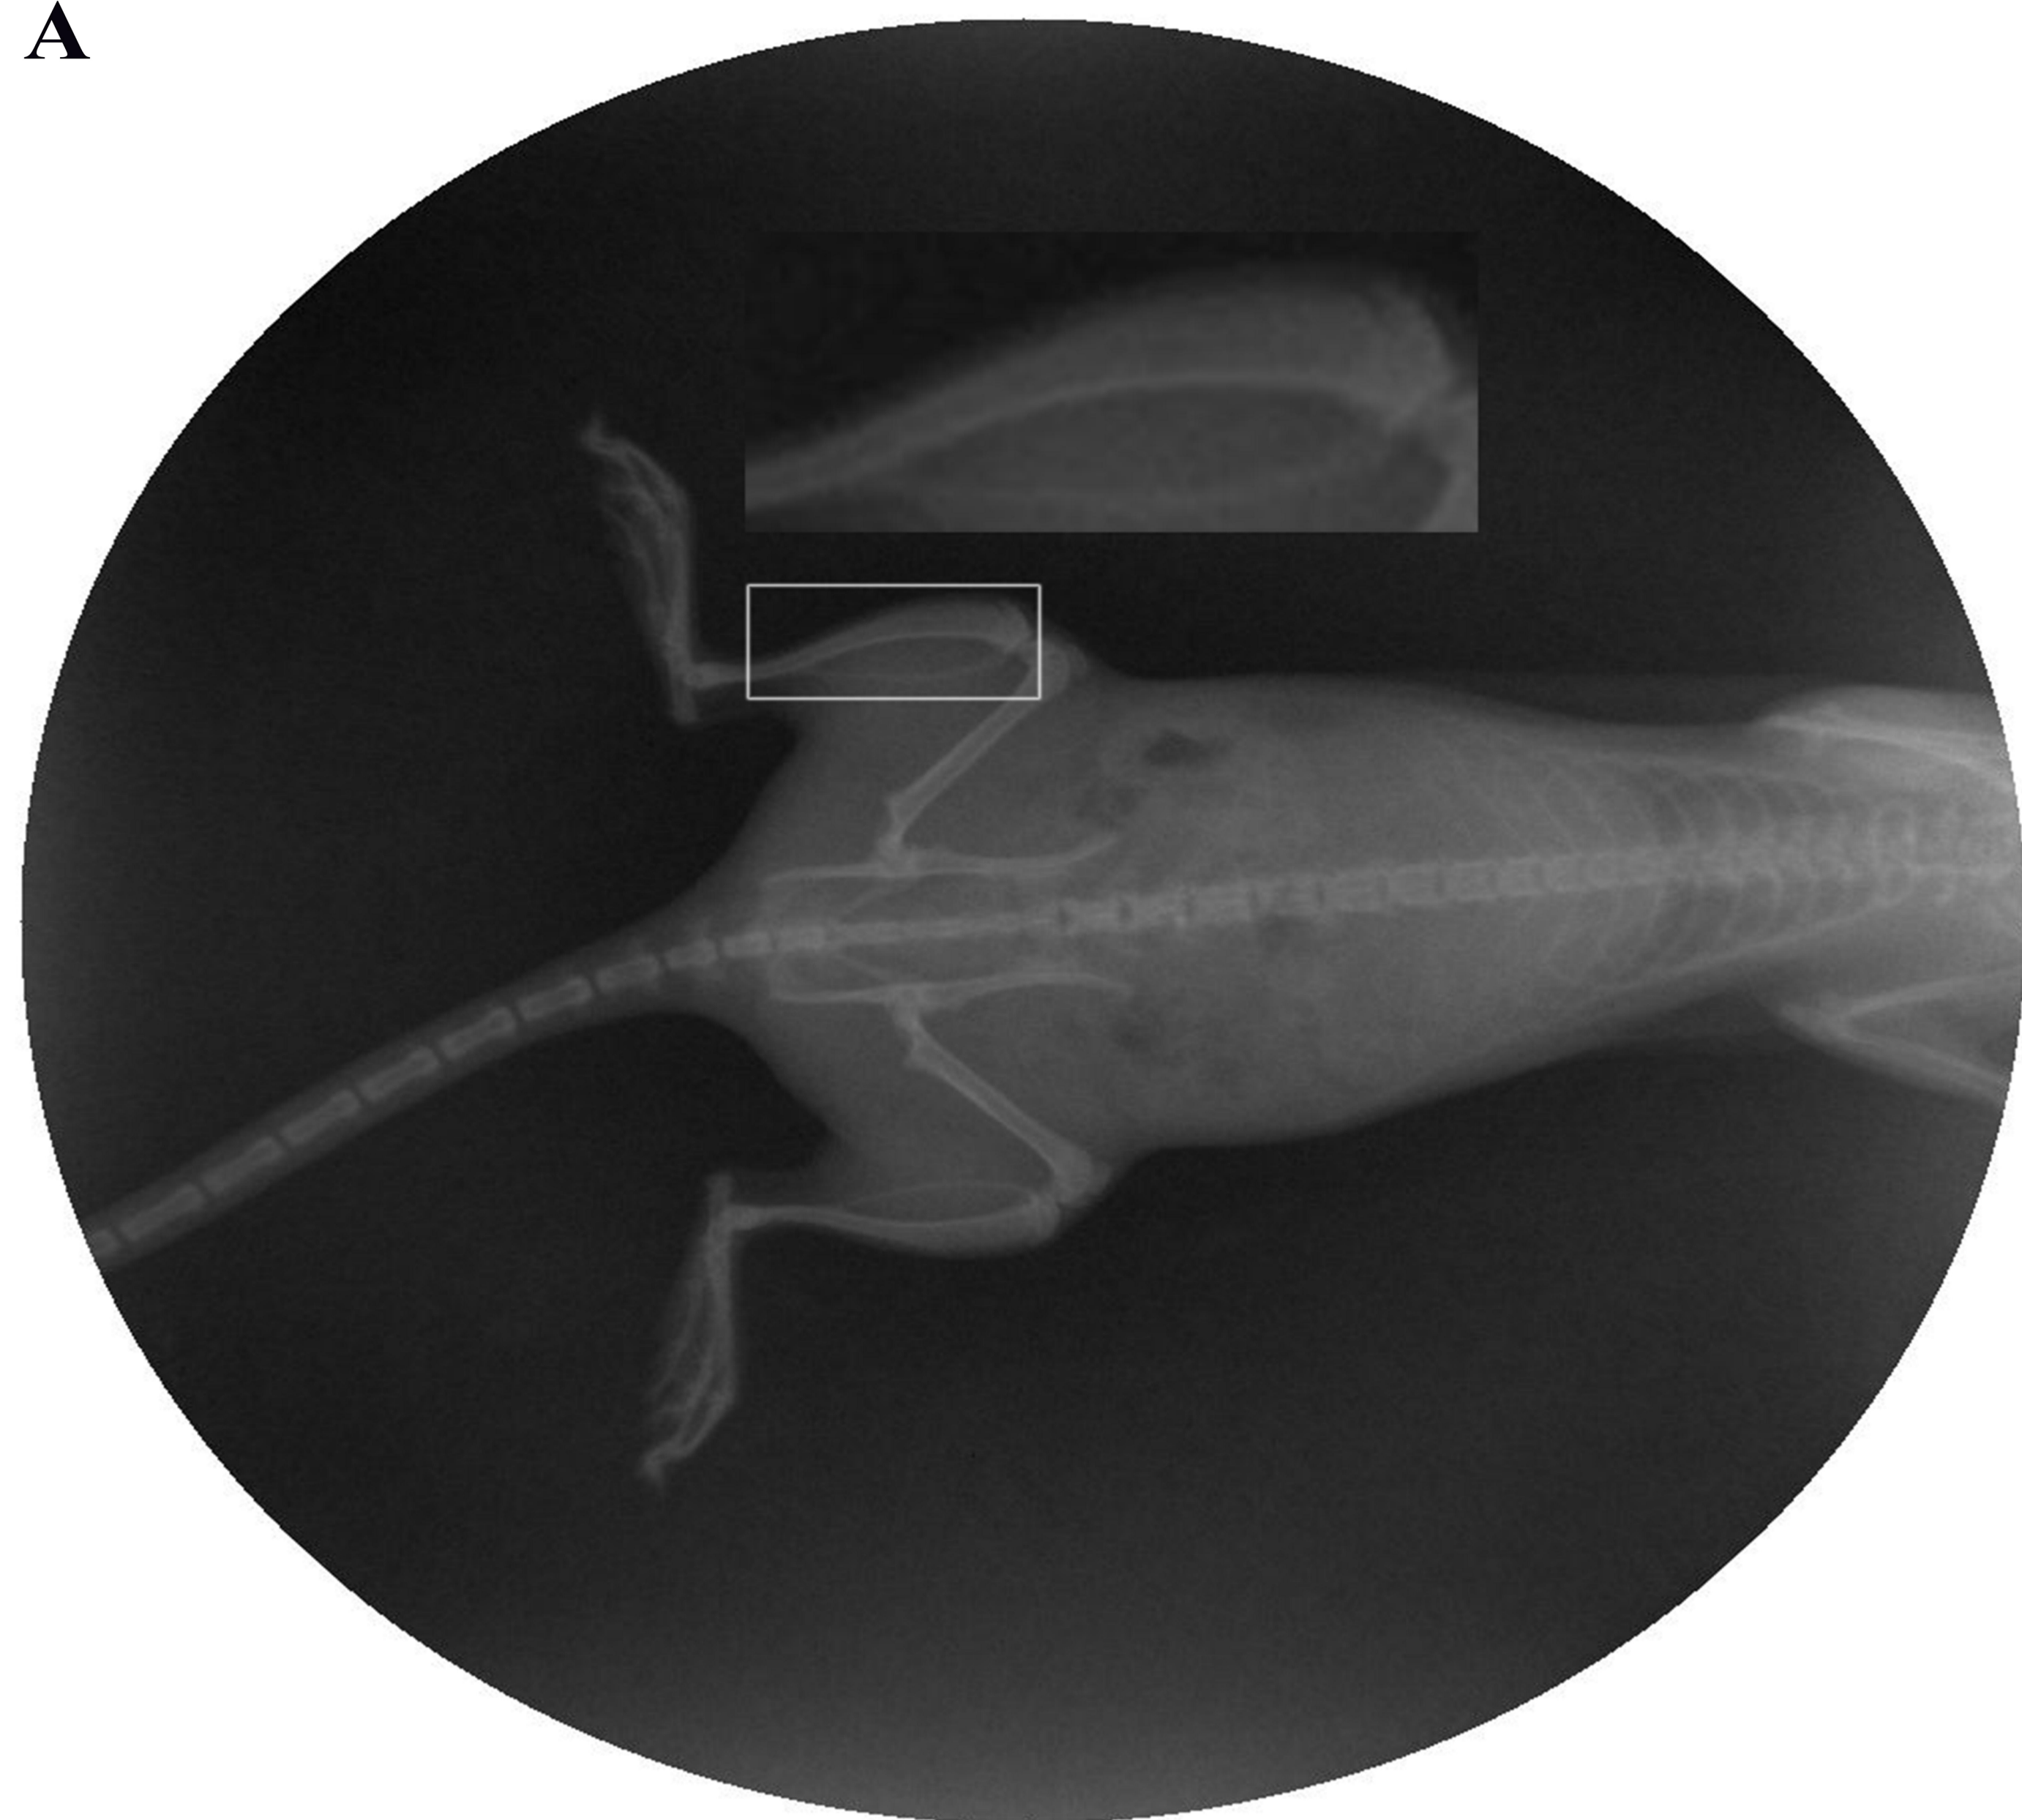**Sham**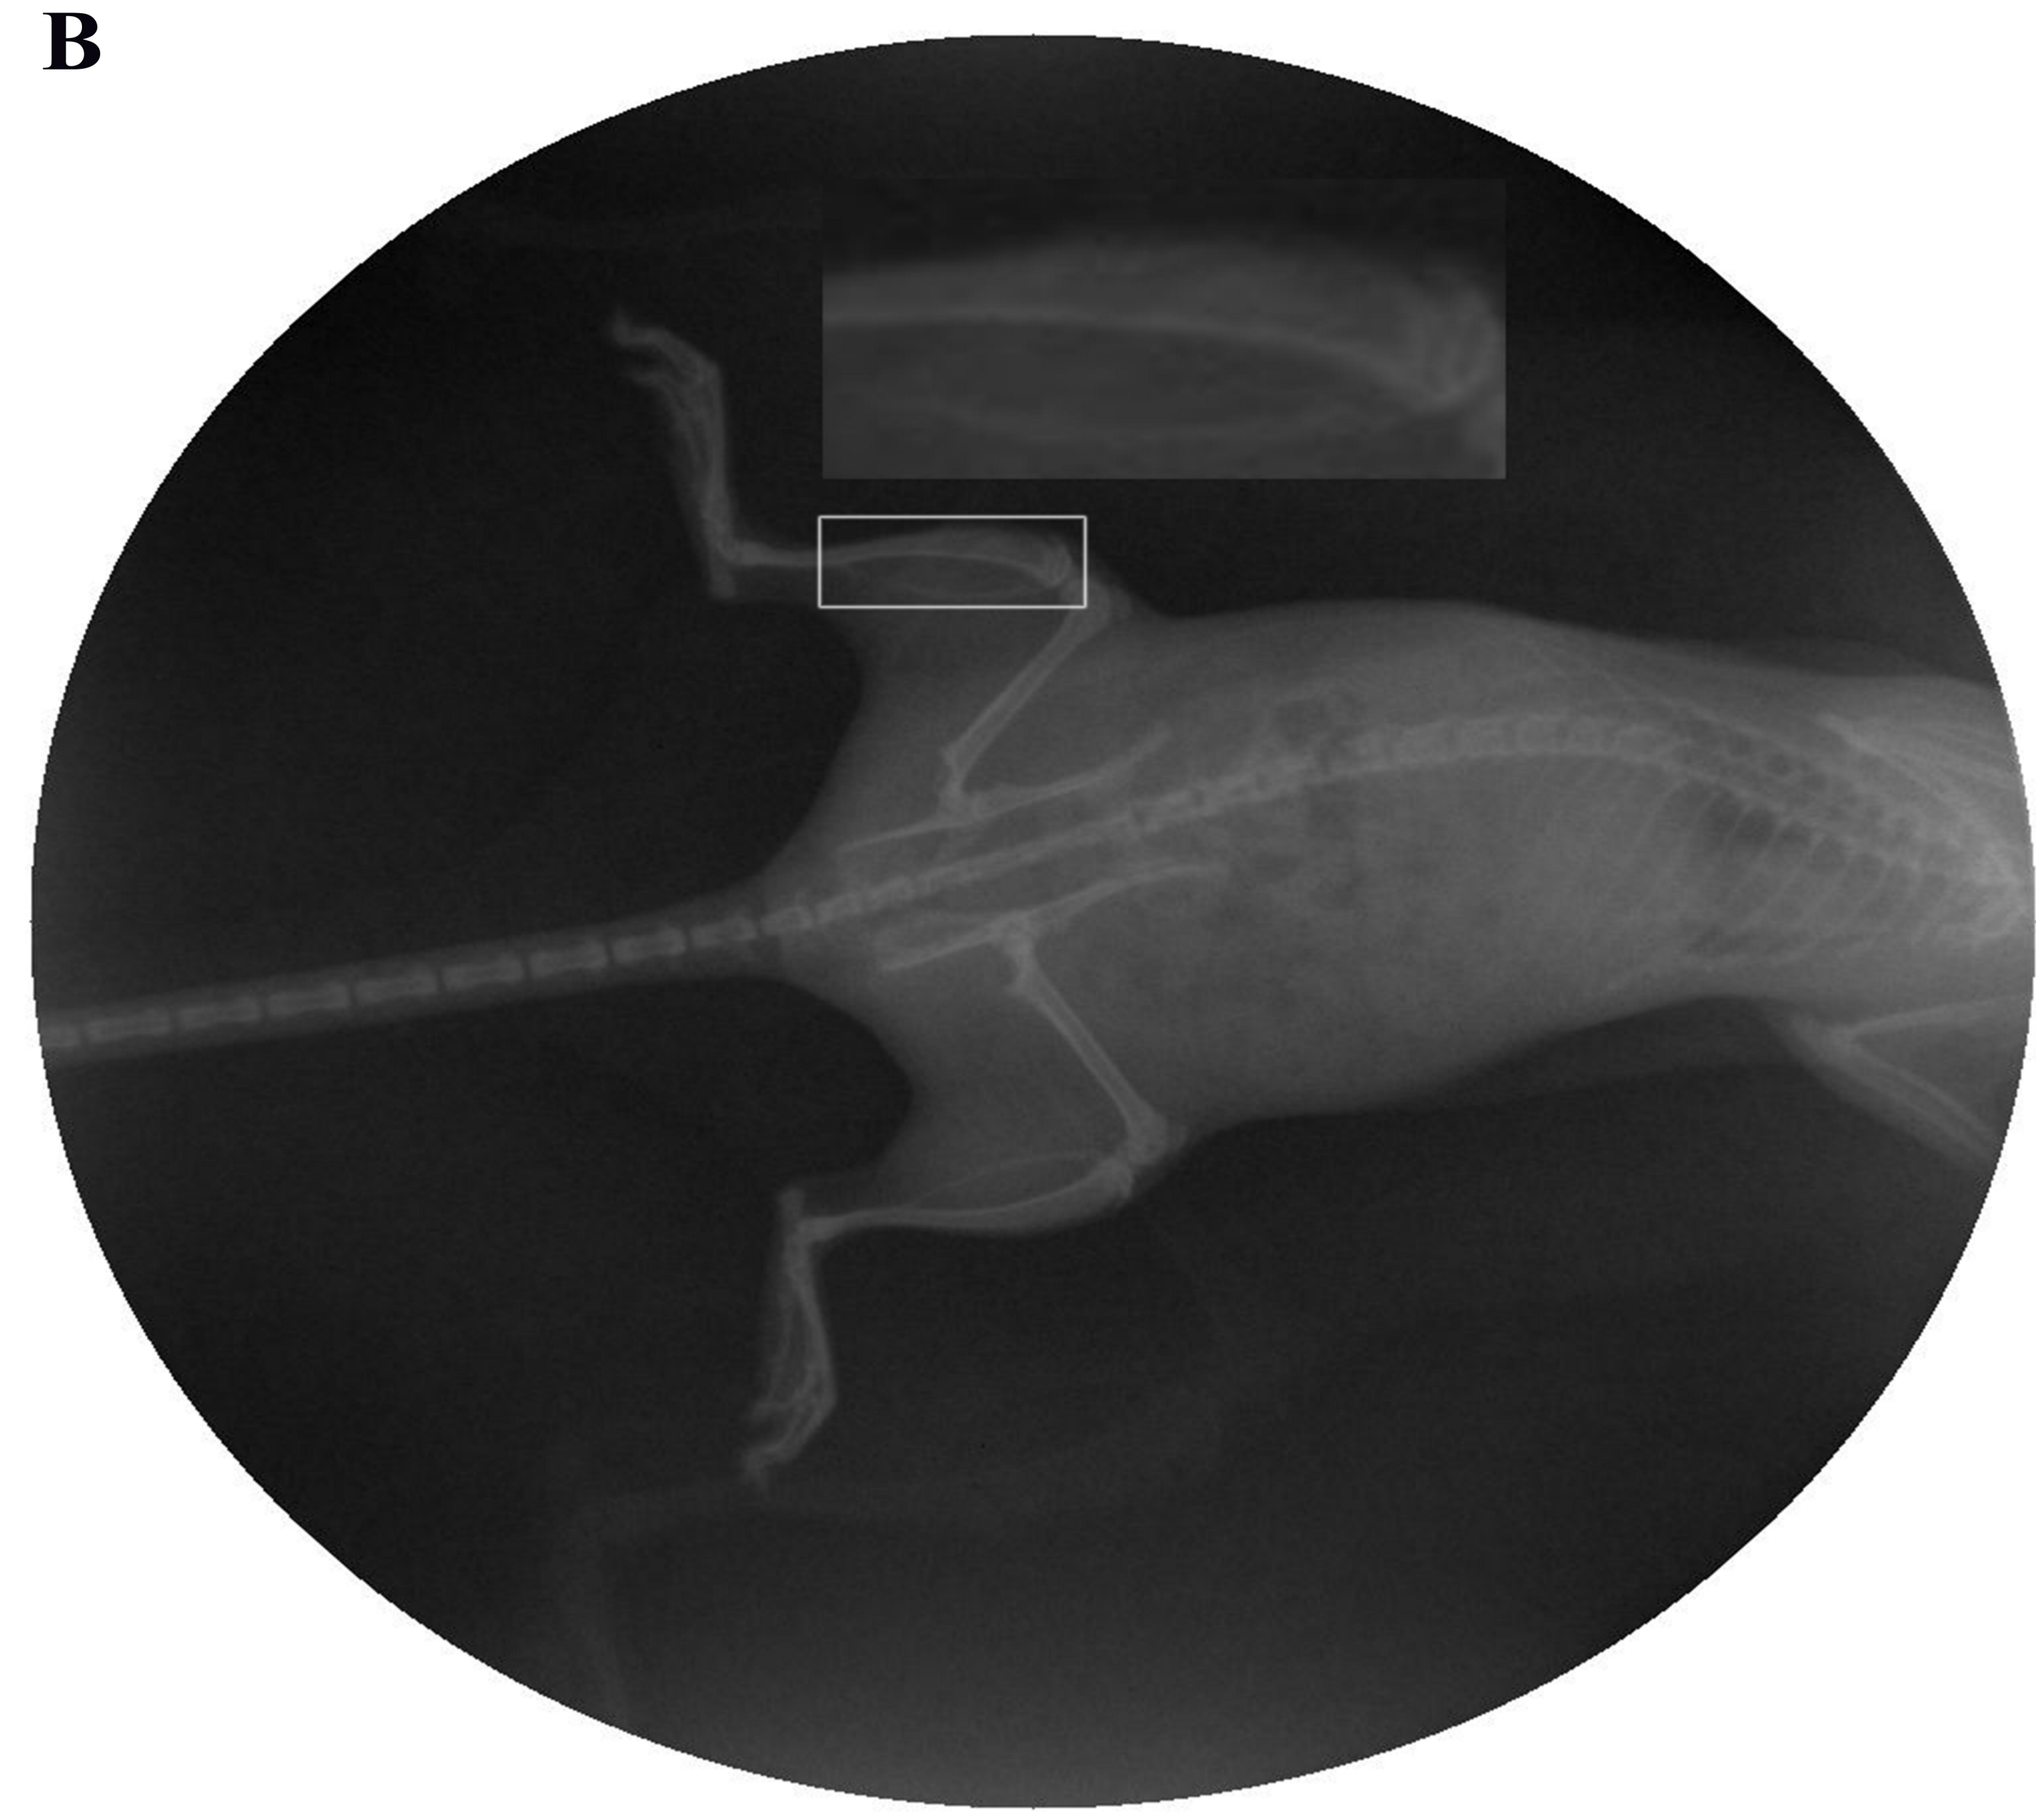**BCP**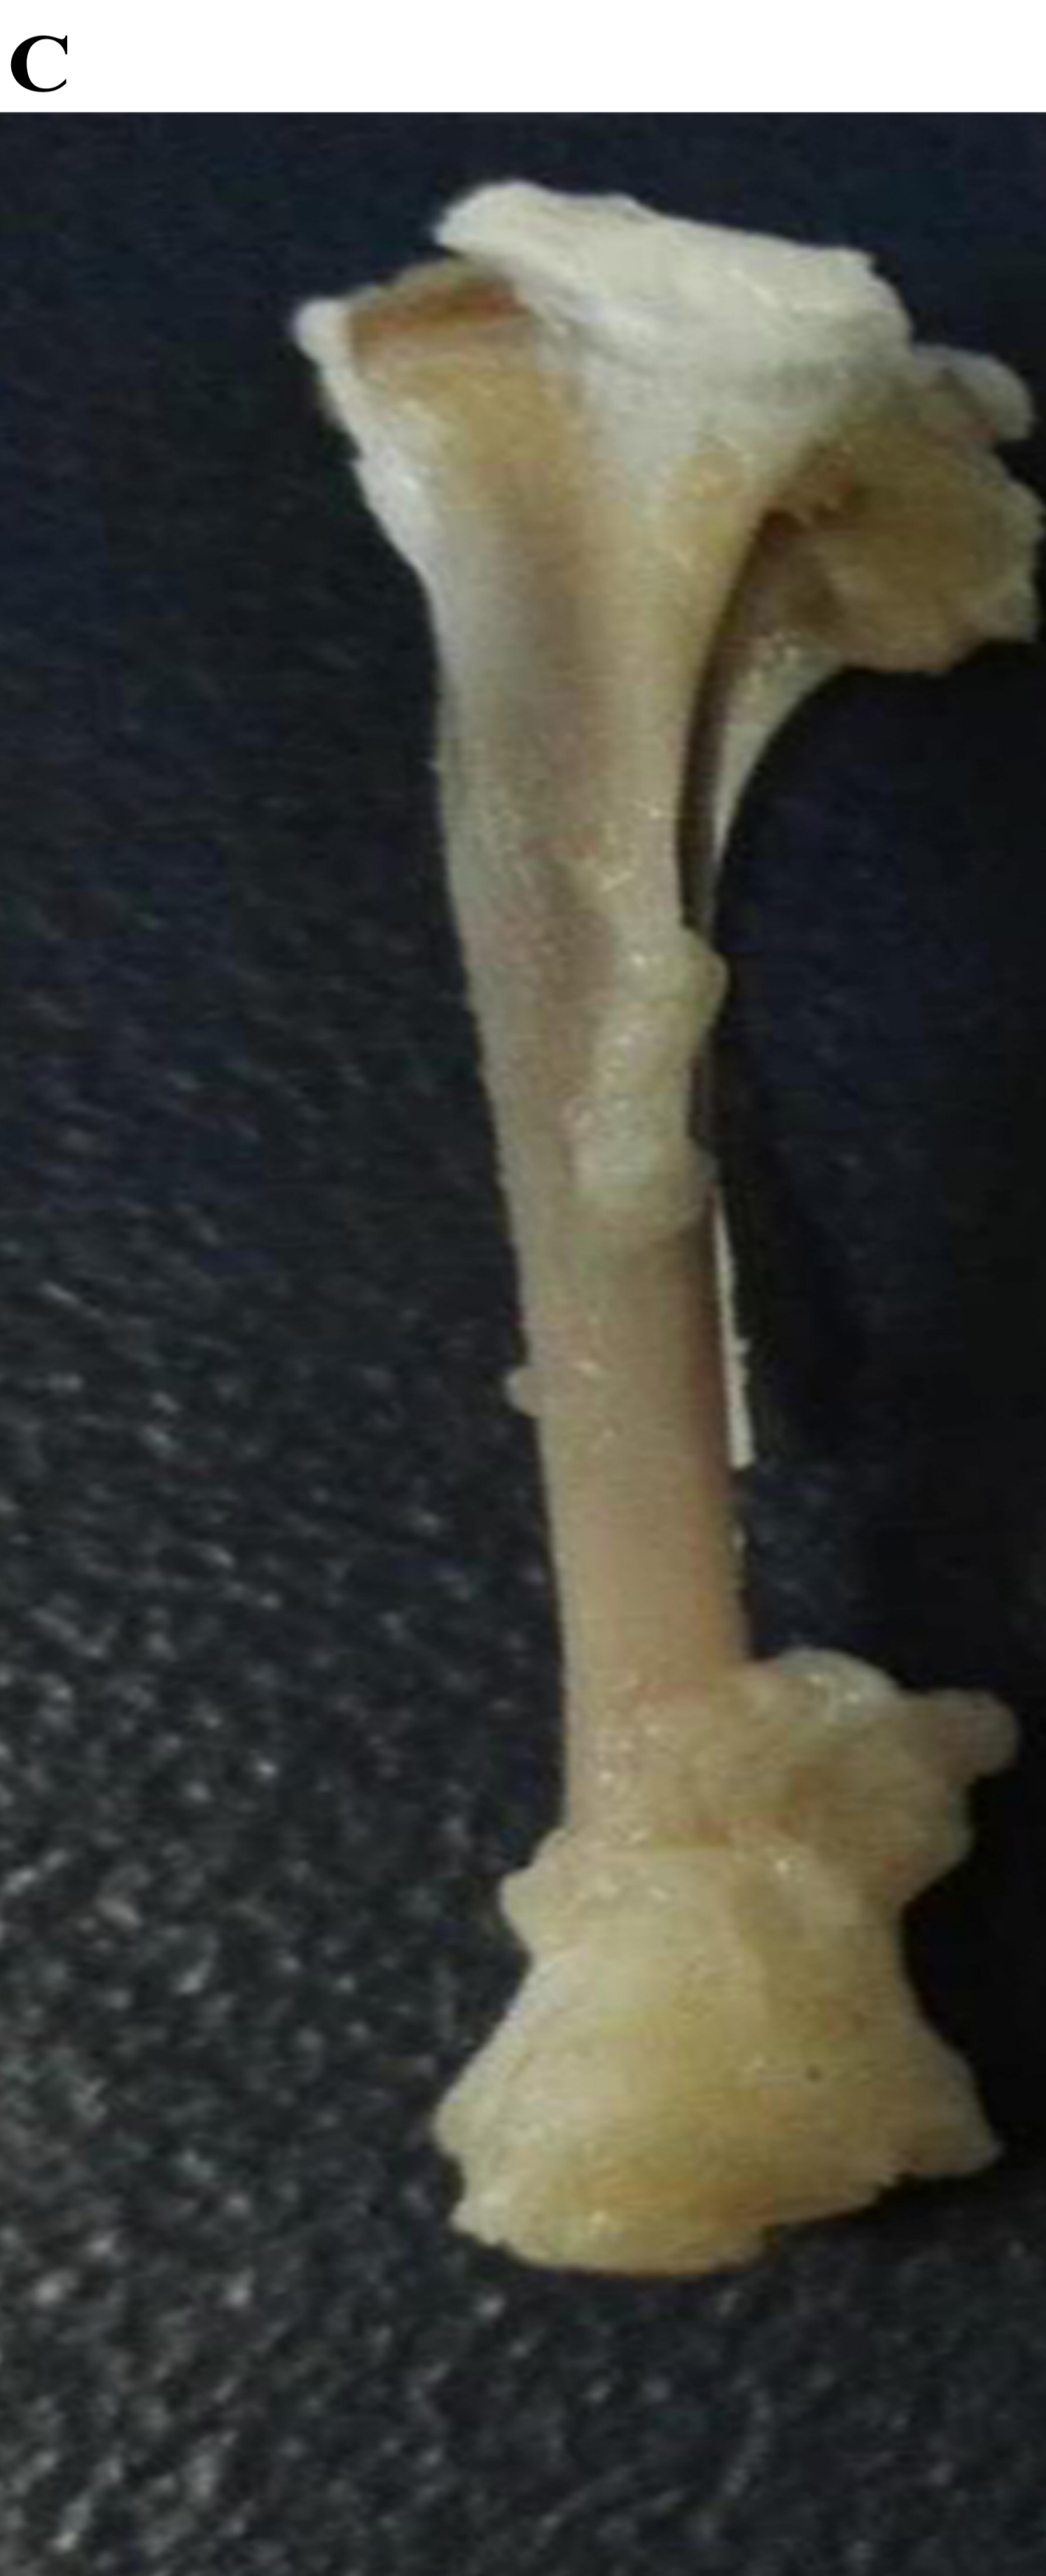**Sham**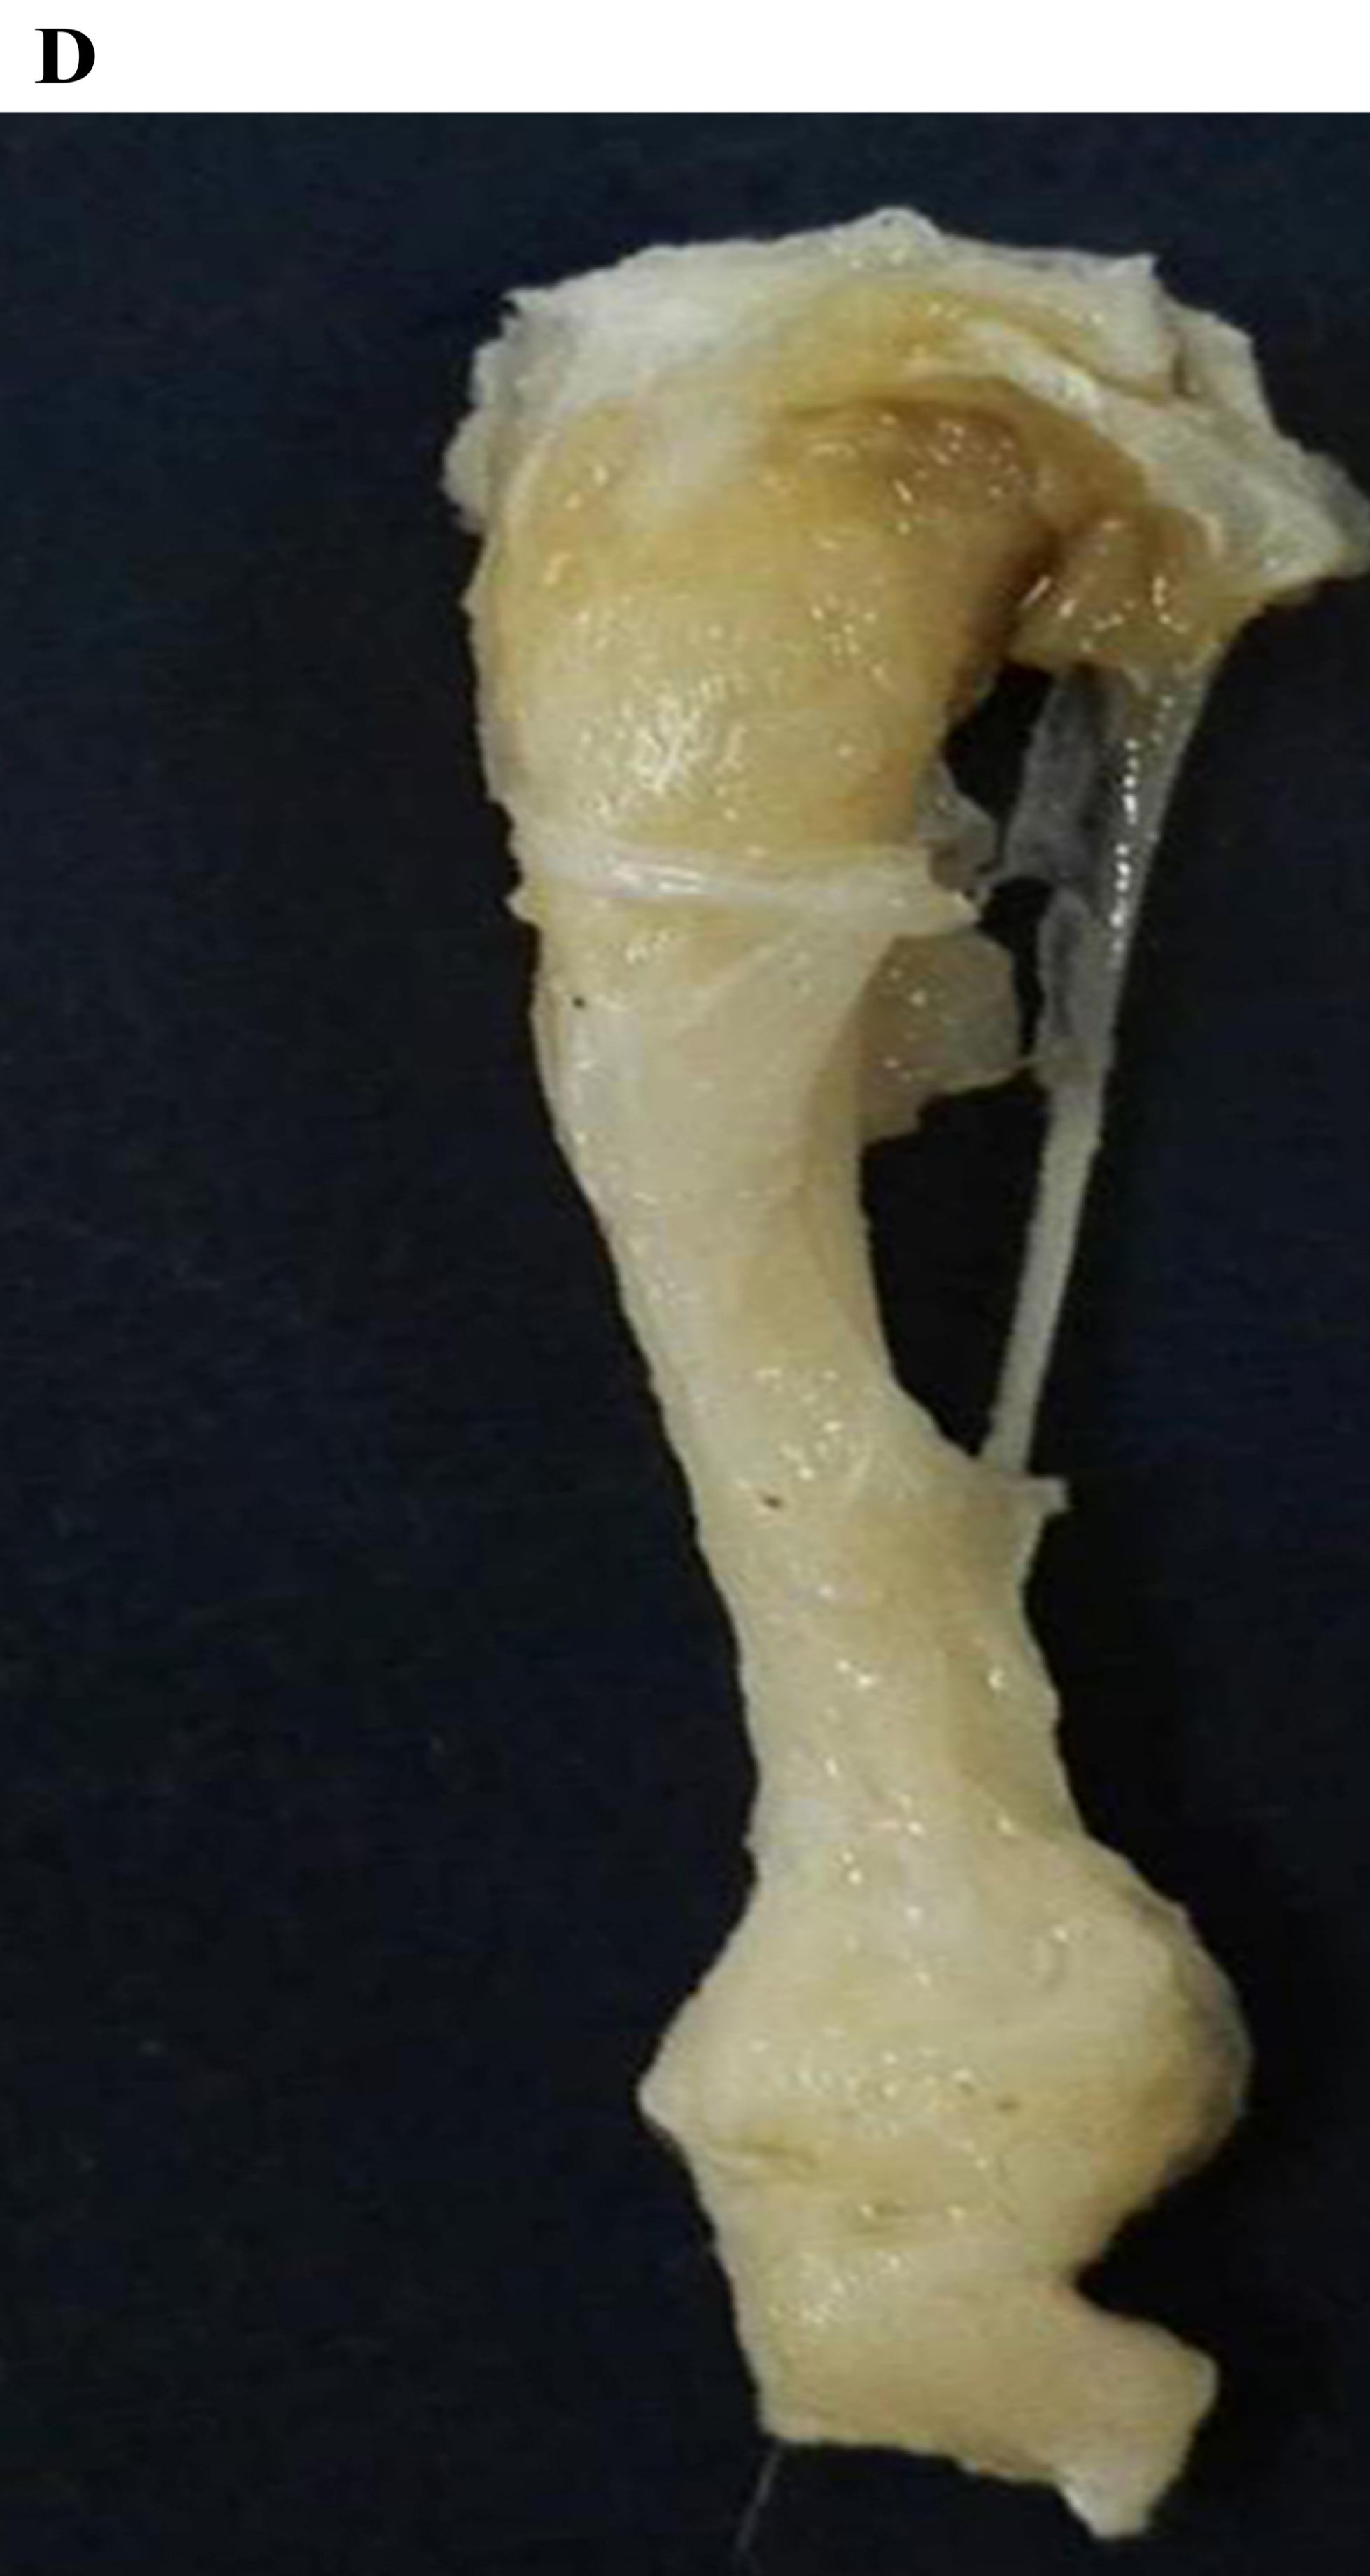**BCP**

Supplementary Fig.1 X-ray and morphological observation of left tibia in rats.

Note: X-ray showed bone destruction in the upper 1/3 segment of the left proximal tibia in rats with bone cancer pain (supplementary Fig.1B). After dissection, the upper third of the left tibia of the rats with bone cancer pain was obviously swollen. (supplementary Fig.1D).
